# Supplementary material for: Machine learning driven prediction of cerebrospinal fluid rhinorrhoea following endonasal skull base surgery: A multicentre prospective observational study
Source: PubMed Central journal article supplement (PMC10076706; doi:10.3389/fonc.2023.1046519), 2023-03-23
Supplement: DataSheet_1.pdf [file DataSheet_1.pdf]

## Supplementary Materials:

Supplementary material 1: List of authors and collaborators. \*indicates joint first authorship. †indicates joint senior authorship.

### Ia. Authors

| Team                                                                                                           | Name                                                 |
|----------------------------------------------------------------------------------------------------------------|------------------------------------------------------|
| Wellcome/EPSRC Centre for Interventional and Surgical Sciences, University College London, London              | Adrito Das*                                          |
| Department of Neurosurgery, National Hospital for Neurology and Neurosurgery, London                           | Danyal Z Khan*                                       |
| Wellcome/EPSRC Centre for Interventional and Surgical Sciences, University College London, London              | Danail Stoyanov†                                     |
| Department of Neurosurgery, National Hospital for Neurology and Neurosurgery, London                           | Hani J Marcus†                                       |
| Oxford University Global Surgery Group, Nuffield Department of Surgical Sciences, University of Oxford, Oxford | Soham Bandyopadhyay                                  |
| Department of Neurology, University Hospital of Wales, Cardiff University, Cardiff                             | Benjamin E Schroeder                                 |
| Division of Neurosurgery, Cambridge University Hospitals Trust, Cambridge                                      | Vikesh Patel                                         |
| Birmingham Medical School, University of Birmingham, Birmingham                                                | Alice O'Donnell                                      |
| NANSIG                                                                                                         | Neurology and Neurosurgery Interest Group            |
| BNTRC                                                                                                          | British Neurosurgical Trainee Research Collaborative |
| Department of Neurosurgery, Aberdeen Royal Infirmary, Aberdeen                                                 | Anastasios Giamouriadis                              |
| Department of Neurosurgery, Aberdeen Royal Infirmary, Aberdeen                                                 | Pragnesh Bhatt                                       |
| Department of Otorhinolaryngology, Aberdeen Royal Infirmary, Aberdeen                                          | Bhaskar Ram                                          |
| Department of Neurosurgery, Aberdeen Royal Infirmary, Aberdeen                                                 | Adithya Varma                                        |
| Department of Neurosurgery, Aberdeen Royal Infirmary, Aberdeen                                                 | Ioannis Georgiou                                     |
| Department of Neurosurgery, Royal Victoria Hospital, Belfast                                                   | Philip Weir                                          |
| Department of Otorhinolaryngology, Royal Victoria Hospital, Belfast                                            | Brendan Hanna                                        |
| Department of Neurosurgery, Royal Victoria Hospital, Belfast                                                   | Theodore C Hirst                                     |
| Department of Neurosurgery, Royal Victoria Hospital, Belfast                                                   | Patrick McAleavey                                    |
| Department of Neurosurgery, Queen Elizabeth Hospital Birmingham, Birmingham                                    | Alessandro Paluzzi                                   |
| Department of Neurosurgery, Queen Elizabeth Hospital Birmingham, Birmingham                                    | Georgios Tsermoulas                                  |
| Department of Otorhinolaryngology, Queen Elizabeth Hospital Birmingham, Birmingham                             | Shahzada Ahmed                                       |
| Department of Neurosurgery, Queen Elizabeth Hospital Birmingham, Birmingham                                    | Wai Cheong Soon                                      |
| Department of Neurosurgery, Queen Elizabeth Hospital Birmingham, Birmingham                                    | Yasir Arafat Chowdhury                               |
| Department of Neurosurgery, Queen Elizabeth Hospital Birmingham, Birmingham                                    | Suhaib Abualsaud                                     |
| Department of Neurosurgery, Queen Elizabeth Hospital Birmingham, Birmingham                                    | Shumail Mahmood                                      |
| Department of Otorhinolaryngology, Queen Elizabeth Hospital Birmingham, Birmingham                             | Paresh Naik                                          |
| Department of Neurosurgery, Queen Elizabeth Hospital Birmingham, Birmingham                                    | Zohra Haiderkhan                                     |
| Department of Neurosurgery, Hurstwood Park Neurosciences Centre and Royal Sussex County Hospital, Brighton     | Rafid Al-Mahfoudh                                    |
| Department of Neurosurgery, Hurstwood Park Neurosciences Centre and Royal Sussex County Hospital, Brighton     | Andrea Perera                                        |
| Department of Neurosurgery, Hurstwood Park Neurosciences Centre and Royal Sussex County Hospital, Brighton     | Mircea Rus                                           |
| Department of Neurosurgery, Southmead Hospital Bristol, Bristol                                                | Adam Williams                                        |
| Department of Neurosurgery, Southmead Hospital Bristol, Bristol                                                | Charles Hand                                         |
| Department of Neurosurgery, Southmead Hospital Bristol, Bristol                                                | Kumar Abhinav                                        |
| Department of Neurosurgery, Southmead Hospital Bristol, Bristol                                                | Cristina Cernei                                      |
| Department of Neurosurgery, Southmead Hospital Bristol, Bristol                                                | Aiman Dilnawaz                                       |
| Division of Neurosurgery, Cambridge University Hospitals Trust, Cambridge                                      | Richard Mannion                                      |
| Division of Neurosurgery, Cambridge University Hospitals Trust, Cambridge                                      | Thomas Santarius                                     |
| Division of Otorhinolaryngology, Cambridge University Hospitals Trust, Cambridge                               | James Tysome                                         |
| Division of Otorhinolaryngology, Cambridge University Hospitals Trust, Cambridge                               | Rishi Sharma                                         |
| Division of Neurosurgery, Cambridge University Hospitals Trust, Cambridge                                      | Angelos G Koliass                                    |
| Division of Otorhinolaryngology, Cambridge University Hospitals Trust, Cambridge                               | Neil Donnelly                                        |
| Division of Neurosurgery, Cambridge University Hospitals Trust, Cambridge                                      | Vikesh Patel                                         |
| Division of Neurosurgery, Cambridge University Hospitals Trust, Cambridge                                      | Ashwin Venkatesh                                     |

|                                                                                              |                          |
|----------------------------------------------------------------------------------------------|--------------------------|
| Department of Neurosurgery, University Hospital of Wales, Cardiff                            | Caroline Hayhurst        |
| Department of Neurosurgery, University Hospital of Wales, Cardiff                            | Amr Mohamed              |
| Department of Otorhinolaryngology, University Hospital of Wales, Cardiff                     | Benjamin Stew            |
| Department of Neurosurgery, University Hospital of Wales, Cardiff                            | Joseph Merola            |
| Department of Neurosurgery, University Hospital of Wales, Cardiff                            | Setthasorn Zhi Yang, Ooi |
| Department of Neurosurgery, Cork University Hospitals, Ireland                               | Mahmoud Kamel            |
| Department of Otorhinolaryngology, Cork University Hospitals, Ireland                        | Mohammad Habibullah Khan |
| Department of Neurosurgery, Cork University Hospitals, Ireland                               | Sahibzada Abrar          |
| Department of Neurosurgery, Cork University Hospitals, Ireland                               | Christopher Mckeon       |
| Department of Neurosurgery, Cork University Hospitals, Ireland                               | Dan McSweeney            |
| Department of Neurosurgery, National Neurosurgical Centre, Beaumont Hospital, Ireland        | Mohsen Javadpour         |
| Department of Otorhinolaryngology, National Neurosurgical Centre, Beaumont Hospital, Ireland | Peter Lacy               |
| Department of Neurosurgery, National Neurosurgical Centre, Beaumont Hospital, Ireland        | Daniel Murray            |
| Department of Neurosurgery, National Neurosurgical Centre, Beaumont Hospital, Ireland        | Elena Roman              |
| Department of Neurosurgery, Ninewells Hospital, Dundee                                       | Kismet Hossain-Ibrahim   |
| Department of Otorhinolaryngology, Ninewells Hospital, Dundee                                | Peter Ross               |
| Department of Neurosurgery, Ninewells Hospital, Dundee                                       | David Bennett            |
| Department of Neurosurgery, Ninewells Hospital, Dundee                                       | Nathan McSorley          |
| Department of Neurosurgery, Ninewells Hospital, Dundee                                       | Adam Hounat              |
| Department of Clinical Neurosciences, BioQuarter, Edinburgh                                  | Patrick Statham          |
| Department of Clinical Neurosciences, BioQuarter, Edinburgh                                  | Mark Hughes              |
| Department of Clinical Neurosciences, BioQuarter, Edinburgh                                  | Alhafidz Hamdan          |
| Department of Clinical Neurosciences, BioQuarter, Edinburgh                                  | Caroline Scott           |
| Department of Neurosurgery, Hull University Teaching Hospitals, Hull                         | Jisinga Joshi            |
| Department of Neurosurgery, Hull University Teaching Hospitals, Hull                         | Anuj Bahl                |
| Department of Neurosurgery, Hull University Teaching Hospitals, Hull                         | Anna Bjornson            |
| Department of Neurosurgery, Leeds Teaching Hospitals, Leeds                                  | Daniel Gatt              |
| Department of Neurosurgery, Leeds Teaching Hospitals, Leeds                                  | Nick Phillips            |
| Department of Neurosurgery, Leeds Teaching Hospitals, Leeds                                  | Neeraj Kalra             |
| Department of Neurosurgery, Leeds Teaching Hospitals, Leeds                                  | Melissa Bautista         |
| Department of Neurosurgery, The Walton Centre, Liverpool                                     | Seerat Shirazi           |
| Department of Neurosurgery, The Walton Centre, Liverpool                                     | Catherine E Gilkes       |
| Department of Neurosurgery, The Walton Centre, Liverpool                                     | Christopher P Millward   |
| Department of Neurosurgery, Barts and The Royal London Hospital, London                      | Ahmad MS Ali             |
| Department of Neurosurgery, Barts and The Royal London Hospital, London                      | Dimitris Paraskevopoulos |
| Department of Neurosurgery, Barts and The Royal London Hospital, London                      | Jarnail Bal              |
| Department of Neurosurgery, Barts and The Royal London Hospital, London                      | Samir Matloob            |
| Department of Neurosurgery, Charing Cross Hospital, London                                   | Rhannon Lobo             |
| Department of Neurosurgery, Charing Cross Hospital, London                                   | Nigel Mendoza            |
| Department of Neurosurgery, Charing Cross Hospital, London                                   | Ramesh Nair              |
| Department of Neurosurgery, Charing Cross Hospital, London                                   | Arthur Dalton            |
| Department of Neurosurgery, Charing Cross Hospital, London                                   | Adarsh Nadig             |
| Department of Neurosurgery, King's College Hospital, London                                  | Lucas Hernandez          |
| Department of Neurosurgery, King's College Hospital, London                                  | Nick Thomas              |
| Department of Neurosurgery, King's College Hospital, London                                  | Eleni Maratos            |
| Department of Neurosurgery, King's College Hospital, London                                  | Jonathan Shapey          |
| Department of Neurosurgery, King's College Hospital, London                                  | Sinan Al-Barazi          |
| Department of Neurosurgery, King's College Hospital, London                                  | Asfand Baig Mirza        |
| Department of Neurosurgery, King's College Hospital, London                                  | Mohamed Okasha           |
| Department of Neurosurgery, King's College Hospital, London                                  | Prabhjot Singh Malhotra  |
| Department of Neurosurgery, King's College Hospital, London                                  | Razna Ahmed              |

|                                                                                                          |                        |
|----------------------------------------------------------------------------------------------------------|------------------------|
| Department of Neurosurgery, National Hospital for Neurology and Neurosurgery, London                     | Neil L Dorward         |
| Department of Neurosurgery, National Hospital for Neurology and Neurosurgery, London                     | Joan Grieve            |
| Department of Neurosurgery, National Hospital for Neurology and Neurosurgery, London                     | Hani J Marcus          |
| Department of Neurosurgery, National Hospital for Neurology and Neurosurgery, London                     | Parag Sayal            |
| Department of Neurosurgery, National Hospital for Neurology and Neurosurgery, London                     | David Choi             |
| Department of Neurosurgery, National Hospital for Neurology and Neurosurgery, London                     | Ivan Cabrilo           |
| Department of Neurosurgery, National Hospital for Neurology and Neurosurgery, London                     | Hugo Layard Horsfall   |
| Department of Neurosurgery, Barking, Havering & Redbridge University Hospitals, London                   | Jonathan Pollock       |
| Department of Neurosurgery, Barking, Havering & Redbridge University Hospitals, London                   | Alireza Shoakazemi     |
| Department of Neurosurgery, Barking, Havering & Redbridge University Hospitals, London                   | Oscar Maccormac        |
| Department of Neurosurgery, Barking, Havering & Redbridge University Hospitals, London                   | Guru N K Amirthalingam |
| Department of Neurosurgery, St George's University Hospitals Trust, London                               | Andrew Martin          |
| Department of Neurosurgery, St George's University Hospitals Trust, London                               | Simon Stapleton        |
| Department of Neurosurgery, St George's University Hospitals Trust, London                               | Florence Hogg          |
| Department of Neurosurgery, St George's University Hospitals Trust, London                               | Daniel Richardson      |
| Department of Neurosurgery, Salford Royal Trust, Manchester                                              | Kanna Gnanalingham     |
| Department of Neurosurgery, Salford Royal Trust, Manchester                                              | Omar Pathmanaban       |
| Department of Neurosurgery, Salford Royal Trust, Manchester                                              | Daniel M Fountain      |
| Department of Otorhinolaryngology, Salford Royal Trust, Manchester                                       | Raj Bhalla             |
| Department of Neurosurgery, Salford Royal Trust, Manchester                                              | Cathal J Hannan        |
| Department of Neurosurgery, Salford Royal Trust, Manchester                                              | Annabel Chadwick       |
| Department of Neurosurgery, Royal Victoria Infirmary, Newcastle                                          | Alistair Jenkins       |
| Department of Neurosurgery, Royal Victoria Infirmary, Newcastle                                          | Claire Nicholson       |
| Department of Neurosurgery, Royal Victoria Infirmary, Newcastle                                          | Syed Shumon            |
| Department of Neurosurgery, Royal Victoria Infirmary, Newcastle                                          | Mohamed Youssef        |
| Department of Neurosurgery, Royal Victoria Infirmary, Newcastle                                          | Callum Allison         |
| Department of Neurosurgery, Queen's Medical Centre Nottingham, Nottingham                                | Graham Dow             |
| Department of Neurosurgery, Queen's Medical Centre Nottingham, Nottingham                                | Iain Robertson         |
| Department of Neurosurgery, Queen's Medical Centre Nottingham, Nottingham                                | Laurence Glancz        |
| Department of Neurosurgery, Queen's Medical Centre Nottingham, Nottingham                                | Murugan Sitaraman      |
| Department of Neurosurgery, Queen's Medical Centre Nottingham, Nottingham                                | Ashwin Kumaria         |
| Department of Neurosurgery, Queen's Medical Centre Nottingham, Nottingham                                | Ananyo Bagchi          |
| Department of Neurosurgery, John Radcliffe Hospital, Oxford University Hospitals, Oxford                 | Simon Cudlip           |
| Department of Neurosurgery, John Radcliffe Hospital, Oxford University Hospitals, Oxford                 | Jane Halliday          |
| Department of Neurosurgery, John Radcliffe Hospital, Oxford University Hospitals, Oxford                 | Rory J Piper           |
| Department of Neurosurgery, John Radcliffe Hospital, Oxford University Hospitals, Oxford                 | Alexandros Boukas      |
| Department of Neurosurgery, John Radcliffe Hospital, Oxford University Hospitals, Oxford                 | Meriem Amarouche       |
| Department of Neurosurgery, John Radcliffe Hospital, Oxford University Hospitals, Oxford                 | Damjan Veljanoski      |
| Department of Neurosurgery, University Hospitals Plymouth, Plymouth                                      | Sam Muquit             |
| Department of Neurosurgery, University Hospitals Plymouth, Plymouth                                      | Ellie Edlmann          |
| Department of Neurosurgery, University Hospitals Plymouth, Plymouth                                      | Haritha Maripi         |
| Department of Neurosurgery, University Hospitals Plymouth, Plymouth                                      | Yi Wang                |
| Department of Neurosurgery, University Hospitals Plymouth, Plymouth                                      | Mehnaz Hossain         |
| Department of Neurosurgery, Lancashire Teaching Hospitals NHS Foundation Trust, Preston                  | Andrew Alalade         |
| Department of Neurosurgery, Lancashire Teaching Hospitals NHS Foundation Trust, Preston                  | Syed Maroof            |
| Department of Neurosurgery, Lancashire Teaching Hospitals NHS Foundation Trust, Preston                  | Pradnya Patkar         |
| Department of Neurosurgery, Royal Hallamshire Hospital & Sheffield Children's Hospital, Sheffield        | Saurabh Sinha          |
| Department of Otorhinolaryngology, Royal Hallamshire Hospital & Sheffield Children's Hospital, Sheffield | Showkat Mirza          |
| Department of Neurosurgery, Royal Hallamshire Hospital & Sheffield Children's Hospital, Sheffield        | Duncan Henderson       |
| Department of Neurosurgery, Royal Hallamshire Hospital & Sheffield Children's Hospital, Sheffield        | Mohammad Saud Khan     |
| Department of Neurosurgery, University Hospital Southampton, Southampton                                 | Nijaguna Mathad        |

|                                                                          |                      |
|--------------------------------------------------------------------------|----------------------|
| Department of Neurosurgery, University Hospital Southampton, Southampton | Jonathan Hempenstall |
| Department of Neurosurgery, University Hospital Southampton, Southampton | Difei Wang           |
| Department of Neurosurgery, University Hospital Southampton, Southampton | Pavan Marwaha        |
| Department of Neurosurgery, Royal Stoke University Hospital, Stoke       | Simon Shaw           |
| Department of Neurosurgery, Royal Stoke University Hospital, Stoke       | Georgios Solomou     |
| Department of Neurosurgery, Royal Stoke University Hospital, Stoke       | Alina Shrestha       |

1b. Collaborators (data validators)

| Team                                                                                                       | Name                     |
|------------------------------------------------------------------------------------------------------------|--------------------------|
| Department of Neurosurgery, Aberdeen Royal Infirmary, Aberdeen                                             | Andrew Fraser            |
| Department of Neurosurgery, Royal Victoria Hospital, Belfast                                               | Theodore Hirst           |
| Department of Neurosurgery, Queen Elizabeth Hospital Birmingham, Birmingham                                | Yasir Chowdhury          |
| Department of Neurosurgery, Hurstwood Park Neurosciences Centre and Royal Sussex County Hospital, Brighton | Sobiya Bilal             |
| Department of Neurosurgery, Southmead Hospital Bristol, Bristol                                            | Jack Wildman             |
| Division of Neurosurgery, Cambridge University Hospitals Trust, Cambridge                                  | Ashwin Venkatesh         |
| Department of Neurosurgery, University Hospital of Wales, Cardiff                                          | Priya Babu               |
| Department of Neurosurgery, Cork University Hospitals, Ireland                                             | Cian Carey               |
| Department of Neurosurgery, National Neurosurgical Centre, Beaumont Hospital, Ireland                      | Renitha Reddi Bathuni    |
| Department of Neurosurgery, Ninewells Hospital, Dundee                                                     | Kismet Hossain-Ibrahim   |
| Department of Neurosurgery, The Western General Hospital, Edinburgh                                        | Joseph Nathaniel Brennan |
| Department of Neurosurgery, Hull University Teaching Hospitals, Hull                                       | Anna Bjornson            |
| Department of Neurosurgery, Leeds Teaching Hospitals, Leeds                                                | Howra Ktayan             |
| Department of Neurosurgery, The Walton Centre, Liverpool                                                   | Sandhya T Trichinopoly   |
| Department of Neurosurgery, Barts and The Royal London Hospital, London                                    | Samir Matloob            |
| Department of Neurosurgery, Charing Cross Hospital, London                                                 | Adarsh Nadig             |
| Department of Neurosurgery, King's College Hospital, London                                                | Mohamed Okasha           |
| Department of Neurosurgery, National Hospital for Neurology and Neurosurgery, London                       | Danyal Khan              |
| Department of Neurosurgery, Barking, Havering & Redbridge University Hospitals, London                     | Alireza Shoakazemi       |
| Department of Neurosurgery, St George's University Hospitals Trust, London                                 | Florence Hogg            |
| Department of Neurosurgery, Salford Royal Trust, Manchester                                                | Seun Sobawale            |
| Department of Neurosurgery, Royal Victoria Infirmary, Newcastle                                            | Amir Suliman             |
| Department of Neurosurgery, Queen's Medical Centre Nottingham, Nottingham                                  | Ashwin Kumaria           |
| Department of Neurosurgery, John Radcliffe Hospital, Oxford University Hospitals, Oxford                   | Rory Piper               |
| Department of Neurosurgery, John Radcliffe Hospital, Oxford University Hospitals, Oxford                   | Will Owen                |
| Department of Neurosurgery, University Hospitals Plymouth, Plymouth                                        | Ellie Edlmann            |
| Department of Neurosurgery, Lancashire Teaching Hospitals NHS Foundation Trust, Preston                    | Afaq Sartaj              |
| Department of Neurosurgery, Royal Hallamshire Hospital & Sheffield Children's Hospital, Sheffield          | Edward Goacher           |
| Department of Neurosurgery, University Hospital Southampton, Southampton                                   | Euan Strachan            |
| Department of Neurosurgery, Royal Stoke University Hospital, Stoke                                         | Georgios Solomou         |
